# Supplementary material for: Microglia are involved in phagocytosis and extracellular digestion during Zika virus encephalitis in young adult immunodeficient mice
Source: PubMed Central journal article supplement (PMC8369691; doi:10.1186/s12974-021-02221-z), 2021-08-16
Supplement: 12974_2021_2221_MOESM1_ESM.pdf [file 12974_2021_2221_MOESM1_ESM.pdf]

## Supplementary methods

### Quantification of interferon- $\alpha$ / $\beta$ mRNAs by reverse transcriptase droplet digital PCR.

Total RNA was extracted from 1 mL of Trizol/brain homogenate mixtures (900  $\mu$ L: 100  $\mu$ L) using Direct-zol RNA MiniPrep Plus Kit (Zymo Research Corporation, Irvine, CA) as described in the manufacturer's instructions. Total RNA concentrations in the extracts, measured using a NanoDrop™ One Microvolume Spectrophotometer (Thermo Fisher Scientific, Hampton, NH), were adjusted to 80 ng per total reaction mix (30  $\mu$ L) to generate cDNAs using random hexamers and the SuperScript™ IV polymerase (both from Invitrogen, Carlsbad, CA). Reverse transcriptase reaction was performed as described in the manufacturer's instructions. For the PCR step, a volume of 5  $\mu$ L of cDNAs was added to 20  $\mu$ L of reaction mix (QX200™ ddPCR™ EvaGreen® Supermix; Bio-Rad Laboratories, Mississauga, ON, Canada) containing primers specific to interferon (IFN)- $\alpha$  and IFN- $\beta$  genes as well as the 18S housekeeping gene (available upon request). PCR reactions were performed in droplets produced with the QX200 droplet generator (Bio-Rad Laboratories). Droplet-partitioned samples were then transferred to a 96-well plate, sealed, and cycled in a C1000 deep-well thermocycler (Bio-Rad Laboratories) under the following cycling protocol: 95°C for 5 min (DNA polymerase activation), 40 cycles at 95°C for 30 s and 57.8°C for 1 min, post-cycling steps at 4°C for 5 min and then at 98°C for 10 min (enzyme inactivation) and an infinite hold at 12°C. The plate was then read in the FAM channel of the QX200 droplet reader (Bio-Rad Laboratories). Data were analyzed using the QuantaSoft software (Version 1.7.4; Bio-Rad Laboratories). The numbers of mRNA

copies of IFN- $\alpha$ / $\beta$  were normalized to those of the housekeeping 18S ribosomal subunit in each sample.

#### **Determination of blood monocyte levels by flow cytometry analysis.**

Blood samples (~150  $\mu$ L) were collected from the mandibular vein of mice and kept in EDTA-coated tubes (ThermoFisher Scientific, Waltham, MA) to prevent coagulation. A volume of 100  $\mu$ L of blood sample was incubated with 5 mL of Red Blood Cell Lysis Buffer 1 $\times$  (BioLegend, San Diego, CA) at room temperature for 20 min. Cell suspensions (100  $\mu$ L) were washed once with Dulbecco's PBS (DPBS) and incubated with purified rat anti-mouse CD16/CD32 antibody (1:100) (clone 2.4G2; BD Biosciences, San Jose, CA) on ice for 30 min to block non-specific binding. After a single washing step with DPBS, cell suspensions (100  $\mu$ L) were labeled with APC-Cy7-CD45 (clone 30-F11; BD Biosciences), BUV737-CD11b (clone M1/70; BD Bioscience) and BV605-Ly6C (clone AL21; BD Biosciences) rat anti-mouse antibodies at 4°C for 40 min. Flow cytometry analyses and data acquisition were performed using a BD SORP LSR II and the BD FACSDiva software (both from BD Biosciences), respectively.
