# Supplementary material for: Microglia are involved in phagocytosis and extracellular digestion during Zika virus encephalitis in young adult immunodeficient mice
Source: PubMed Central journal article supplement (PMC8369691; doi:10.1186/s12974-021-02221-z), 2021-08-16
Supplement: 12974_2021_2221_MOESM2_ESM.pdf [file 12974_2021_2221_MOESM2_ESM.pdf]

**Supplementary Table 1.** Scoring system used to evaluate the extent of Zika virus antigen immunostaining in mouse brain.

| <b>Score</b> | <b>Definition</b>                                                                                                                         |
|--------------|-------------------------------------------------------------------------------------------------------------------------------------------|
| Grade 0      | No or very weak staining.                                                                                                                 |
| Grade 1      | Weak staining partially covering the analyzed region.                                                                                     |
| Grade 2      | Moderate staining covering partially or almost entirely the analyzed region;<br>weak staining covering entirely the analyzed region.      |
| Grade 3      | Moderate staining covering almost entirely or entirely the analyzed region<br>or intense staining partially covering the analyzed region. |
| Grade 4      | Intense staining covering almost entirely the analyzed region or moderate to<br>intense staining covering entirely the analyzed region.   |
| Grade 5      | Intense staining covering entirely the analyzed region.                                                                                   |
