# Supplementary material for: Microglia are involved in phagocytosis and extracellular digestion during Zika virus encephalitis in young adult immunodeficient mice
Source: PubMed Central journal article supplement (PMC8369691; doi:10.1186/s12974-021-02221-z), 2021-08-16
Supplement: 12974_2021_2221_MOESM3_ESM.pdf [file 12974_2021_2221_MOESM3_ESM.pdf]

**Supplementary Table 2.** Ratios of mRNA copies of interferon- $\alpha$ - $\beta$  to housekeeping 18S ribosomal subunit in the brain of mice infected with Zika virus.

| <b>Day post-infection</b> | <b>Ratio IFN-<math>\alpha</math> to 18S mRNAs</b><br><b>Mean <math>\pm</math> SEM (a.u.)</b> | <b>Ratio IFN-<math>\beta</math> to 18S mRNAs</b><br><b>Mean <math>\pm</math> SEM (a.u.)</b> |
|---------------------------|----------------------------------------------------------------------------------------------|---------------------------------------------------------------------------------------------|
| 0 (non-infected)          | $6.14 \times 10^{-7} \pm 1.86 \times 10^{-7}$                                                | $2.18 \times 10^{-8} \pm 6.22 \times 10^{-9}$                                               |
| 3                         | $6.89 \times 10^{-7} \pm 1.53 \times 10^{-7}$                                                | $2.63 \times 10^{-8} \pm 5.85 \times 10^{-9}$                                               |
| 7                         | $6.45 \times 10^{-7} \pm 1.47 \times 10^{-7}$                                                | $4.15 \times 10^{-8} \pm 1.04 \times 10^{-8}$                                               |
| 10                        | $4.58 \times 10^{-7} \pm 3.46 \times 10^{-8}$                                                | $1.68 \times 10^{-8} \pm 1.51 \times 10^{-9}$                                               |
| 14                        | $4.50 \times 10^{-7} \pm 2.18 \times 10^{-8}$                                                | $2.78 \times 10^{-8} \pm 4.20 \times 10^{-9}$                                               |

a.u., arbitrary unit; SEM, standard error of the mean.  
Results are the mean  $\pm$  SEM of 5-6 mice per time point.
