# Supplementary material for: Microglia are involved in phagocytosis and extracellular digestion during Zika virus encephalitis in young adult immunodeficient mice
Source: PubMed Central journal article supplement (PMC8369691; doi:10.1186/s12974-021-02221-z), 2021-08-16
Supplement: 12974_2021_2221_MOESM4_ESM.pdf [file 12974_2021_2221_MOESM4_ESM.pdf]

**Supplementary Table 3.** Nanoscale subcellular localization of Zika virus antigens labeled with immunogold in both layers of the dorsal hippocampus CA1 of mice not treated or treated with PLX5622.

| Parameters                      |                        | Number of nanogold particles |           |          |           |                |           |           |
|---------------------------------|------------------------|------------------------------|-----------|----------|-----------|----------------|-----------|-----------|
|                                 |                        | Parenchymal cells            |           |          |           | Vascular cells |           |           |
|                                 |                        | Neuron                       | Astro     | Oligo    | Microglia | EC             | Pericyte  | Other     |
| <b>Not treated with PLX5622</b> |                        |                              |           |          |           |                |           |           |
| <i>st rad</i>                   | Cytoplasm              | 1                            | 2         | 0        | 0         | 0              | 0         | 1         |
|                                 | Endosome               | 2                            | 0         | 0        | 3         | 0              | 0         | 2         |
|                                 | Endoplasmic reticulum  | 1                            | 1         | 0        | 0         | 0              | 0         | 0         |
|                                 | Golgi                  | 0                            | 0         | 0        | 0         | 0              | 0         | 0         |
|                                 | Plasma membrane        | 0                            | 1         | 0        | 2         | 0              | 0         | 1         |
|                                 | Mitochondrial membrane | 0                            | 0         | 0        | 0         | 0              | 0         | 0         |
|                                 | Nuclear membrane       | 1                            | 2         | 0        | 0         | 0              | 0         | 1         |
|                                 | Nucleus                | 0                            | 1         | 0        | 0         | 0              | 0         | 0         |
|                                 | <b>Total</b>           | <b>5</b>                     | <b>7</b>  | <b>0</b> | <b>5</b>  | <b>0</b>       | <b>0</b>  | <b>5</b>  |
| <i>st lac mol</i>               | Cytoplasm              | 3                            | 1         | 0        | 0         | 0              | 2         | 5         |
|                                 | Endosome               | 0                            | 7         | 0        | 6         | 1              | 2         | 1         |
|                                 | Endoplasmic reticulum  | 1                            | 4         | 0        | 0         | 0              | 3         | 3         |
|                                 | Golgi                  | 0                            | 0         | 0        | 0         | 0              | 1         | 0         |
|                                 | Plasma membrane        | 1                            | 0         | 0        | 0         | 1              | 2         | 0         |
|                                 | Mitochondrial membrane | 0                            | 0         | 0        | 0         | 0              | 0         | 0         |
|                                 | Nuclear membrane       | 2                            | 0         | 0        | 0         | 1              | 2         | 4         |
|                                 | Nucleus                | 0                            | 6         | 0        | 0         | 0              | 2         | 0         |
|                                 | <b>Total</b>           | <b>7</b>                     | <b>18</b> | <b>0</b> | <b>6</b>  | <b>3</b>       | <b>14</b> | <b>13</b> |
| <b>Treated with PLX5622</b>     |                        |                              |           |          |           |                |           |           |
| <i>st rad</i>                   | Cytoplasm              | 9                            | 3         | 0        | 0         | 0              | 0         | 0         |
|                                 | Endosome               | 17                           | 10        | 0        | 0         | 0              | 1         | 0         |
|                                 | Endoplasmic reticulum  | 5                            | 1         | 1        | 2         | 0              | 0         | 0         |
|                                 | Golgi                  | 0                            | 0         | 0        | 0         | 0              | 0         | 0         |
|                                 | Plasma membrane        | 0                            | 0         | 0        | 0         | 0              | 0         | 0         |
|                                 | Mitochondrial membrane | 0                            | 0         | 0        | 0         | 0              | 0         | 0         |
|                                 | Nuclear membrane       | 2                            | 1         | 5        | 0         | 0              | 1         | 0         |
|                                 | Nucleus                | 0                            | 0         | 0        | 0         | 0              | 0         | 0         |
|                                 | <b>Total</b>           | <b>33</b>                    | <b>15</b> | <b>6</b> | <b>2</b>  | <b>0</b>       | <b>2</b>  | <b>0</b>  |
| <i>st lac mol</i>               | Cytoplasm              | 9                            | 40        | 0        | 0         | 0              | 0         | 0         |
|                                 | Endosome               | 5                            | 31        | 0        | 0         | 2              | 0         | 5         |
|                                 | Endoplasmic reticulum  | 0                            | 9         | 0        | 0         | 0              | 0         | 0         |
|                                 | Golgi                  | 0                            | 0         | 0        | 0         | 0              | 0         | 0         |
|                                 | Plasma membrane        | 1                            | 3         | 0        | 0         | 0              | 0         | 0         |
|                                 | Mitochondrial membrane | 0                            | 0         | 0        | 0         | 0              | 0         | 0         |

|  |                  |           |           |          |          |          |          |          |
|--|------------------|-----------|-----------|----------|----------|----------|----------|----------|
|  | Nuclear membrane | 2         | 13        | 0        | 0        | 0        | 0        | 1        |
|  | Nucleus          | 0         | 1         | 0        | 0        | 0        | 0        | 0        |
|  | <b>Total</b>     | <b>17</b> | <b>97</b> | <b>0</b> | <b>0</b> | <b>2</b> | <b>0</b> | <b>6</b> |

Astro, astrocyte; EC, endothelial cell; Oligo, oligodendrocyte; *st rad*, *stratum radiatum*; *st lac mol*, *stratum lacunosum-moleculare*. The subcellular localization of nanogold particles was determined in the different cells reported in the Table 5 of the manuscript.
